# Supplementary material for: An Inverse Correlation between the Atherogenic Index of Plasma and Heart Failure: An Analysis of the National Health and Nutrition Examination Survey 2017–March 2020 Pre-Pandemic Data
Source: MDPI journal article supplement (doi:10.3390/jcdd9120412), 2022-11-23
Supplement: s1 [file s1]

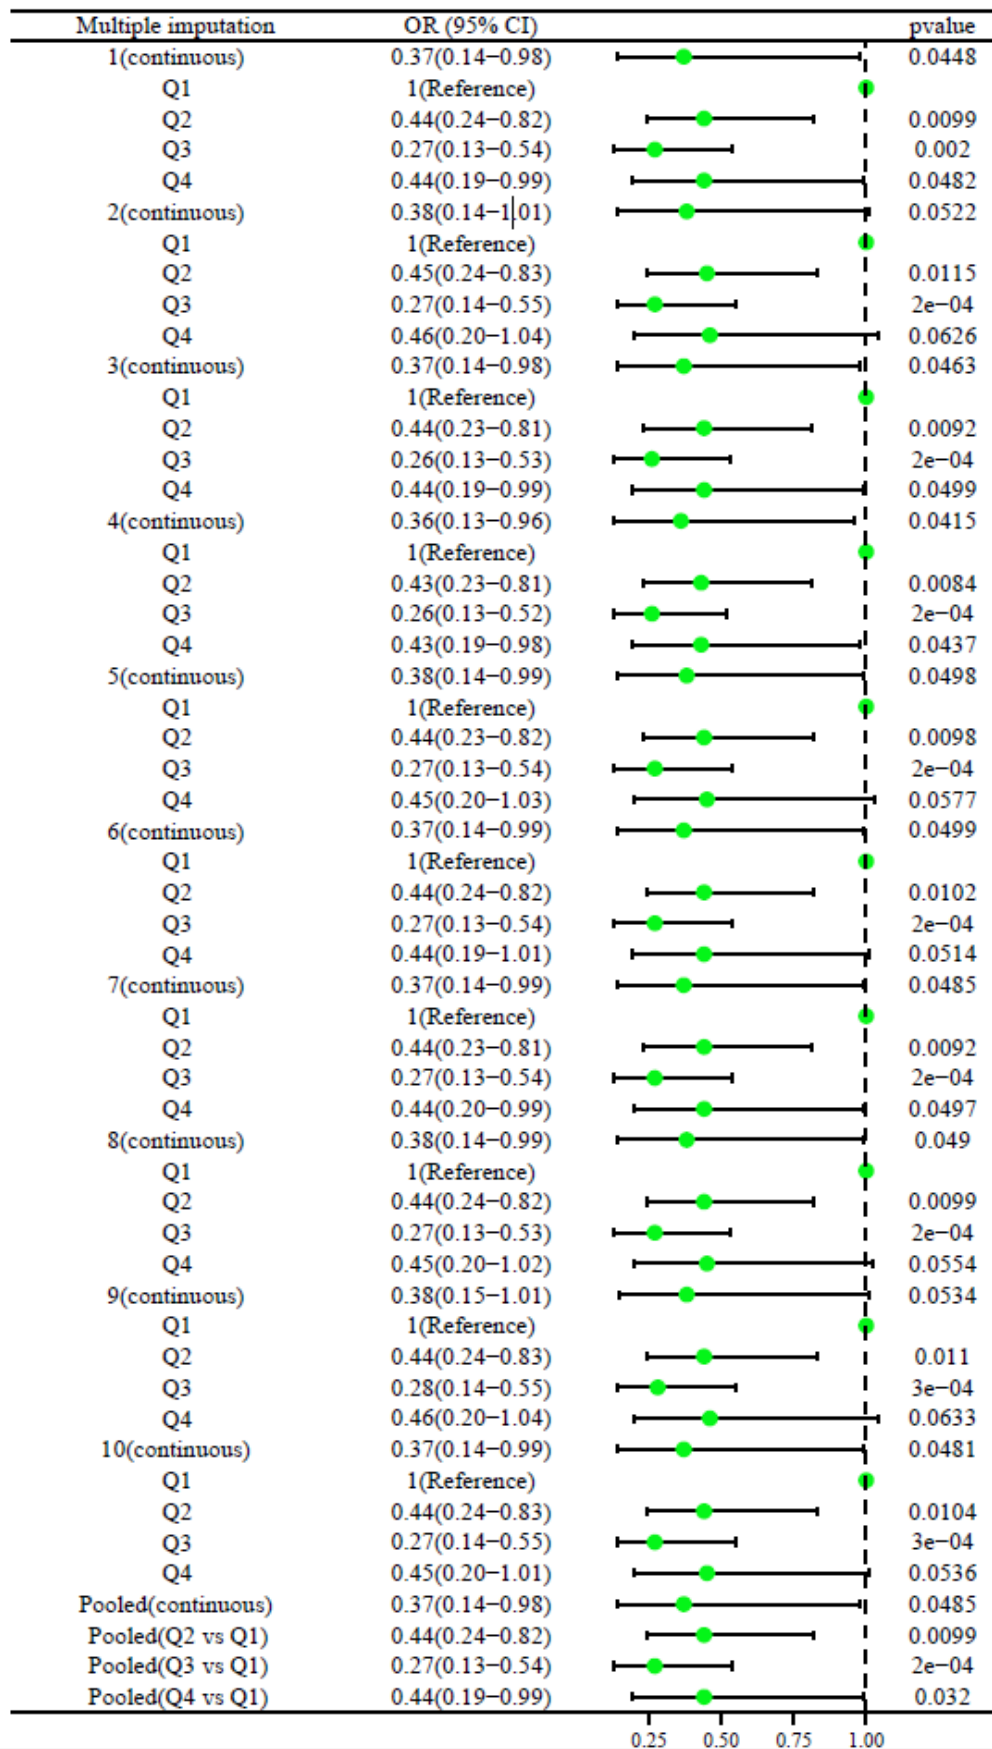

Figure S1: Pooled ORs for the atherogenic index of plasma and incident heart failure for multiple imputations (10 rounds) of missing data

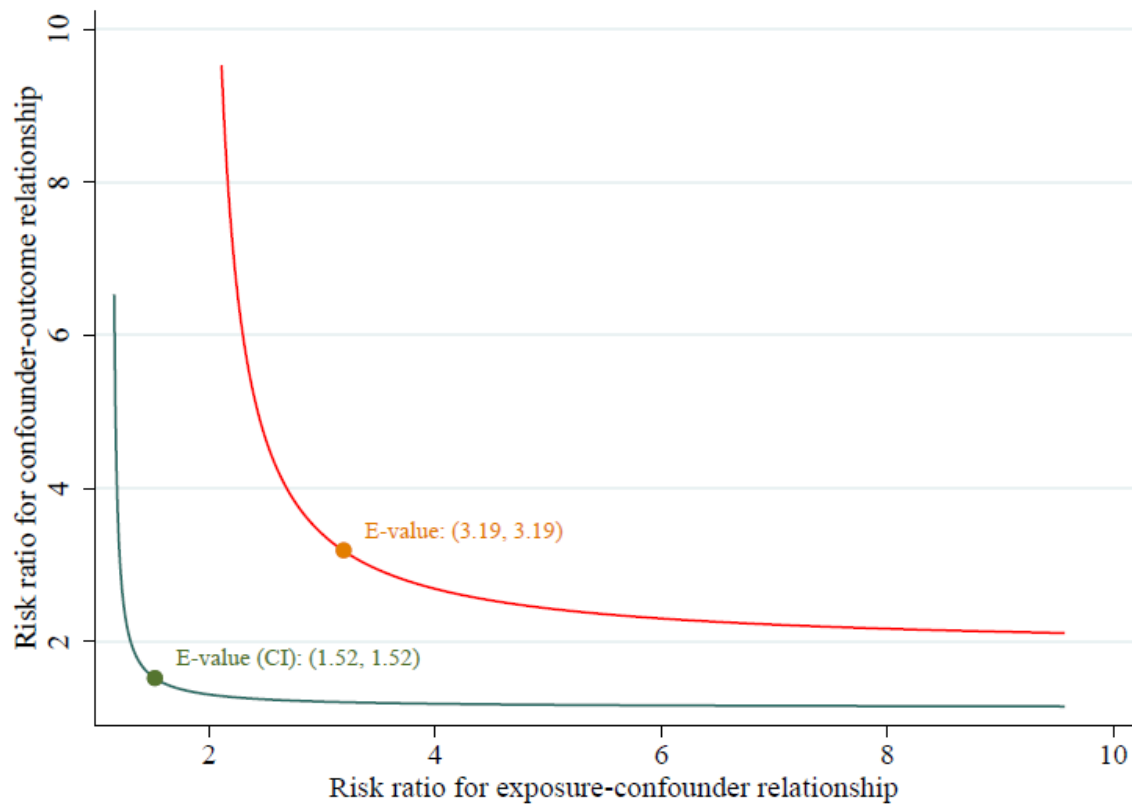

Figure S2: E-value for the lower 95% CI, point estimate of the atherogenic index of plasma, and incident heart failure. The value of the joint minimum strength of association on the risk ratio scale that an unmeasured confounder must have with the exposure and outcome to fully describe the AIP and HF hazard ratios.
